# Supplementary material for: Parallel adaptation and cryptic global expansion of Mycobacterium tuberculosis Lineage 3
Source: Research Square preprint supplement (doi:10.21203/rs.3.rs-8437865/v1), 2026-01-16
Supplement: Supplementary file 1 [file 7c51a309ea47d5393a81cf3e.docx]

**Parallel adaptation and cryptic global expansion of Mycobacterium tuberculosis Lineage 3**


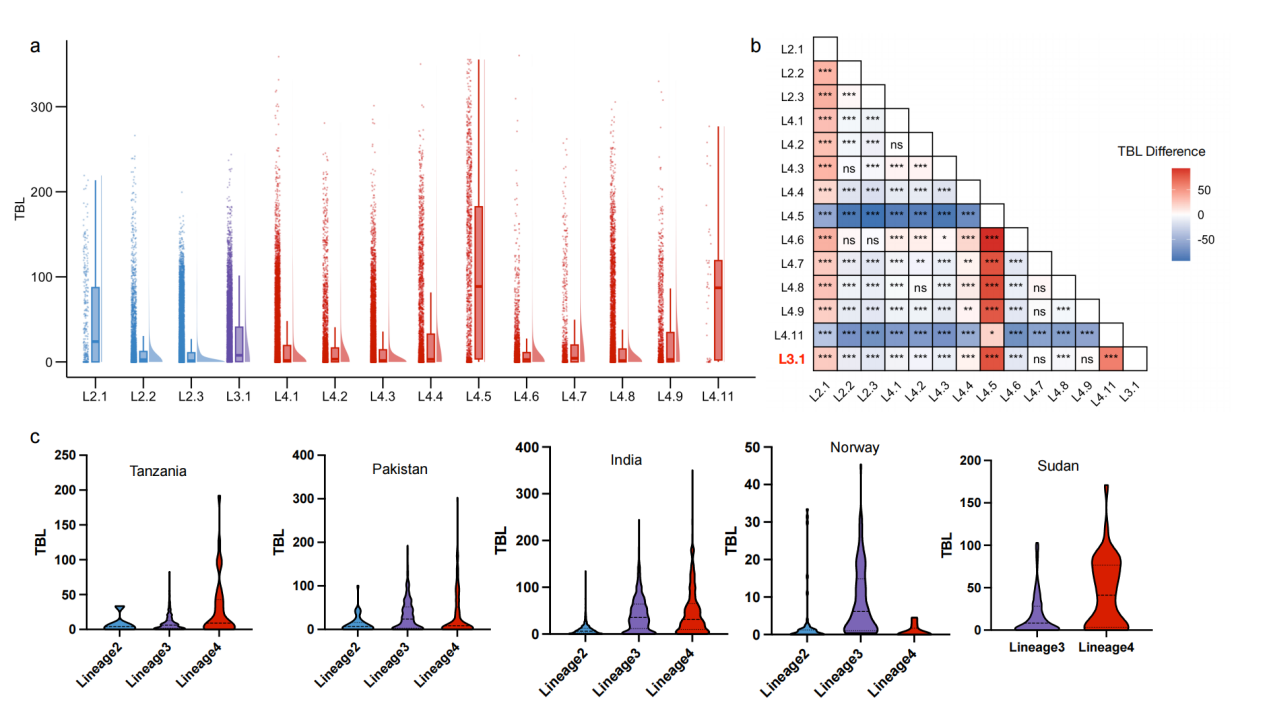


****Supplementary Fig. 1. Terminal branch length (TBL) analysis across** M. tuberculosis **Lineages 2, 3, and 4 sub-lineages.** (a)** Raincloud plot showing the distribution of TBLs for all sub-lineages of L2, L3, and L4. Each point represents a single isolate, with overlaid density and boxplot. **(b)** Heatmap comparing mean TBLs of L3.1 sub-lineages against other L2 and L4 sub-lineages. L3.1 exhibits significantly shorter TBLs than geographically restricted sub-lineages (L2.1, L4.5, and L4.11), and is comparable to several widely disseminated L4 sub-lineages. **(c)** Comparison of TBLs across L2, L3, and L4 in the top five countries with the highest L3 burden, highlighting the relative branch lengths within each lineage by country.


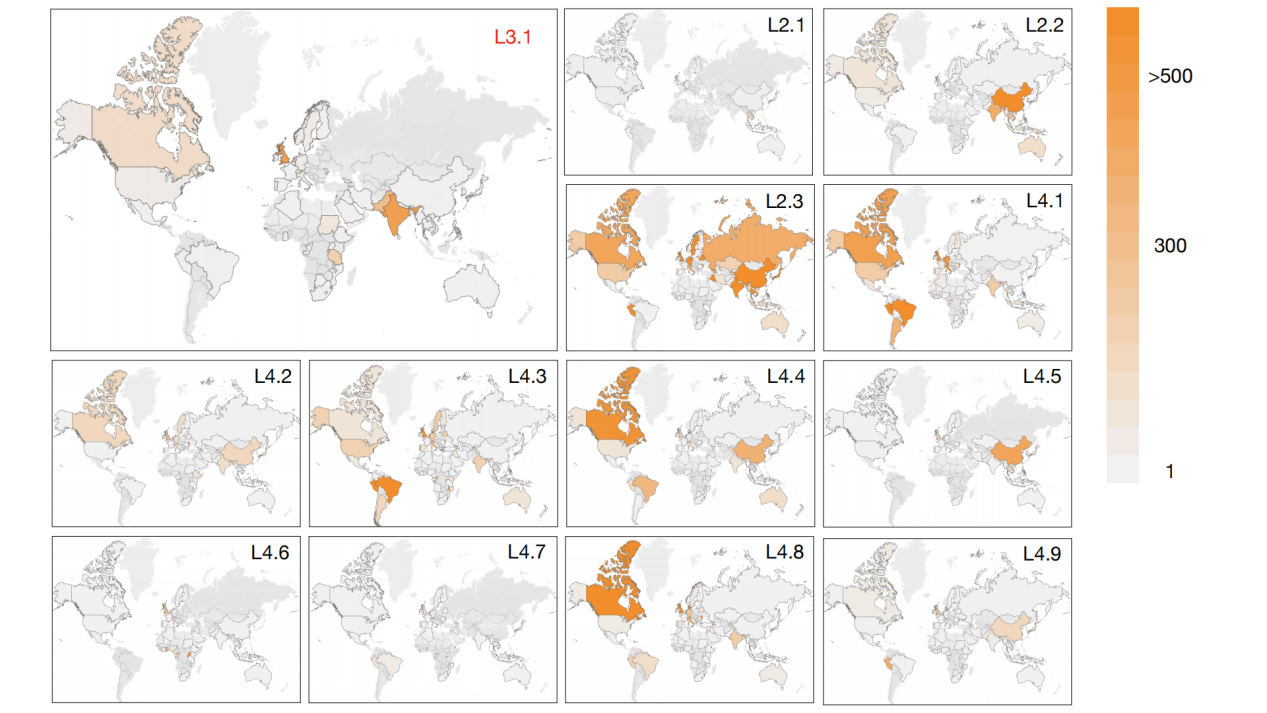


**Supplementary Fig. 2. Global prevalence maps of all M. tuberculosis Lineages 2, 3, and 4 sub-lineages. Each map displays the geographic distribution of sub-lineages within L2, L3, and L4. Colors indicate relative prevalence of each sub-lineage in individual countries.**


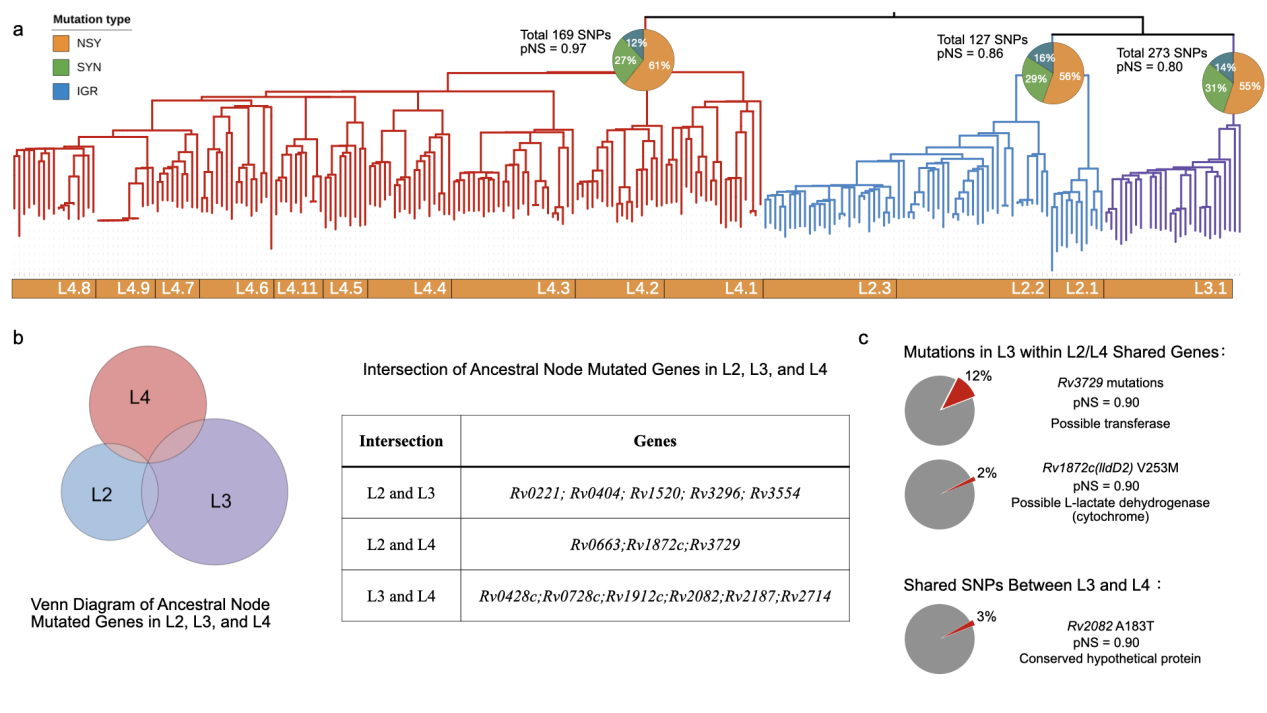


**Supplementary Fig. 3. Analysis of ancestral node mutations across M. tuberculosis Lineages 2, 3, and 4. (a)** Phylogenetic tree showing the number of nonsynonymous and synonymous mutations accumulated at ancestral nodes, with corresponding pN/pS ratios annotated for each major lineage. **(b)** Venn diagram illustrating shared and lineage-specific genes carrying ancestral mutations among L2, L3, and L4.  **(c)** Comparative analysis of convergent ancestral mutations observed in L2 and L4 and their selection status within L3, highlighting potential lineage-intrinsic adaptive constraints.


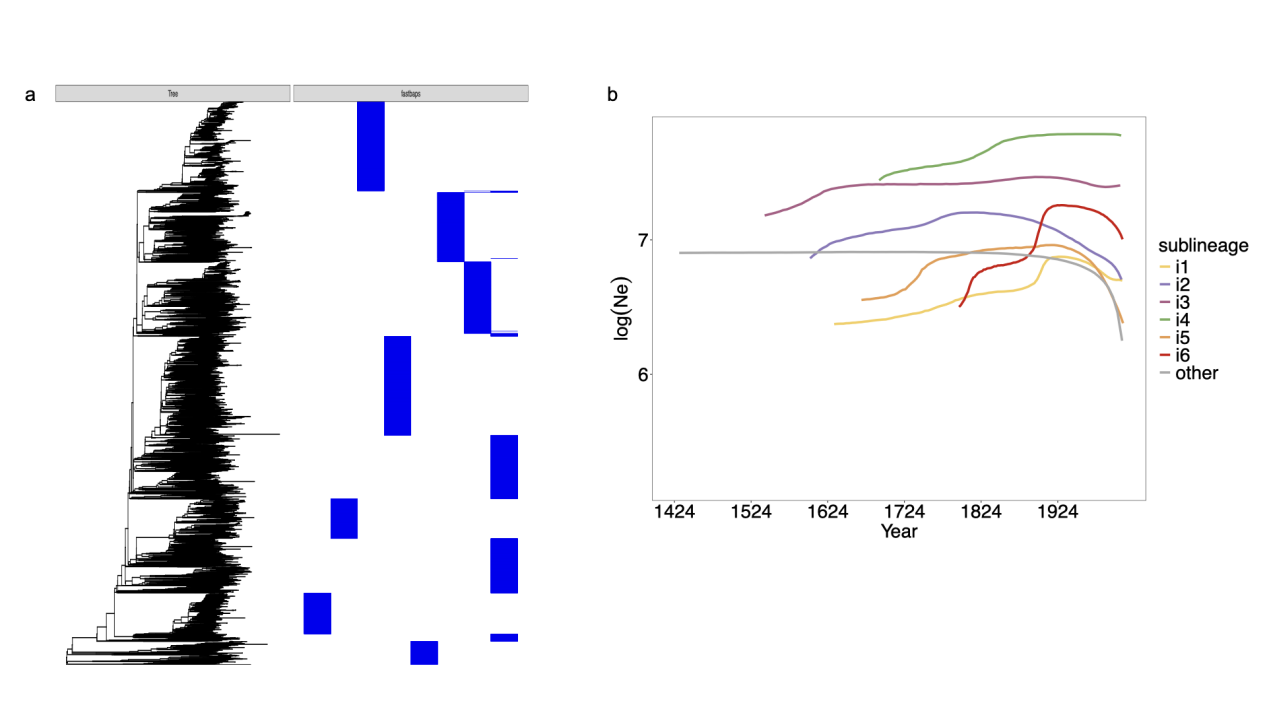


****Supplementary Fig. 4. Sub-lineage delineation and demographic reconstruction of L3.1.1.** (a)** Sub-lineage classification of L3.1.1 based on FastBAPS clustering. Single, discrete clusters are labeled i1–i6; the remaining non-contiguous composite cluster is designated as the “legacy” group, representing historical, non-expanding lineages. **(b)** Bayesian skyline plots showing the reconstructed demographic histories of the six emerging sub-lineages (i1–i6) and the legacy group. Each line represents the effective population size over time, highlighting heterogeneous expansion dynamics among sub-lineages.


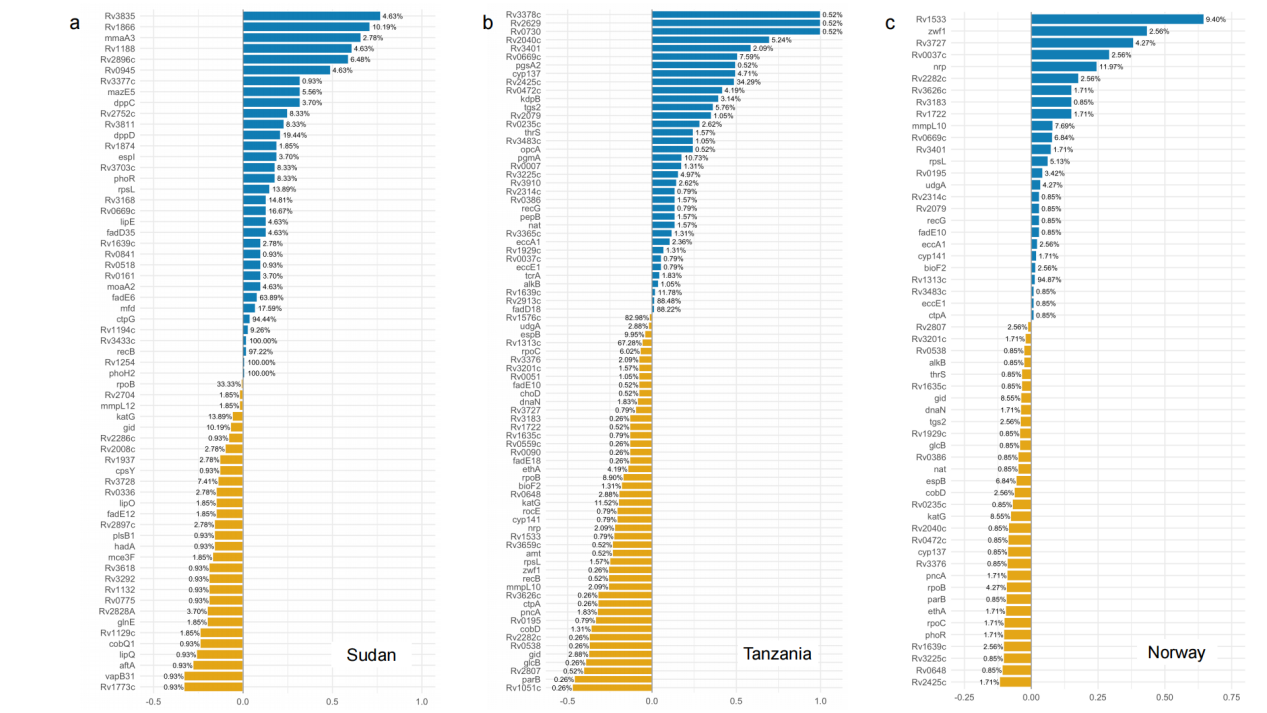


**Supplementary Fig. 5. Country-specific distribution of selected genes within L3.1.1 sub-lineages.** Bar plots indicate the proportion of isolates carrying positively selected mutations in each sub-lineage relative to the proportion of isolates from the corresponding country. Values of zero indicate perfect concordance between the gene-specific and country-specific proportions; positive values indicate overrepresentation, and negative values indicate underrepresentation. Numbers above each bar show the percentage of all isolates from that country carrying the mutation. Only genes where ≥90% of mutated isolates are confined to a single country and account for ≥30% of that country’s isolates are considered to show country-specific selection. Panels show data for **(a)** Sudan, **(b)** Tanzania, and **(c)** Norway.


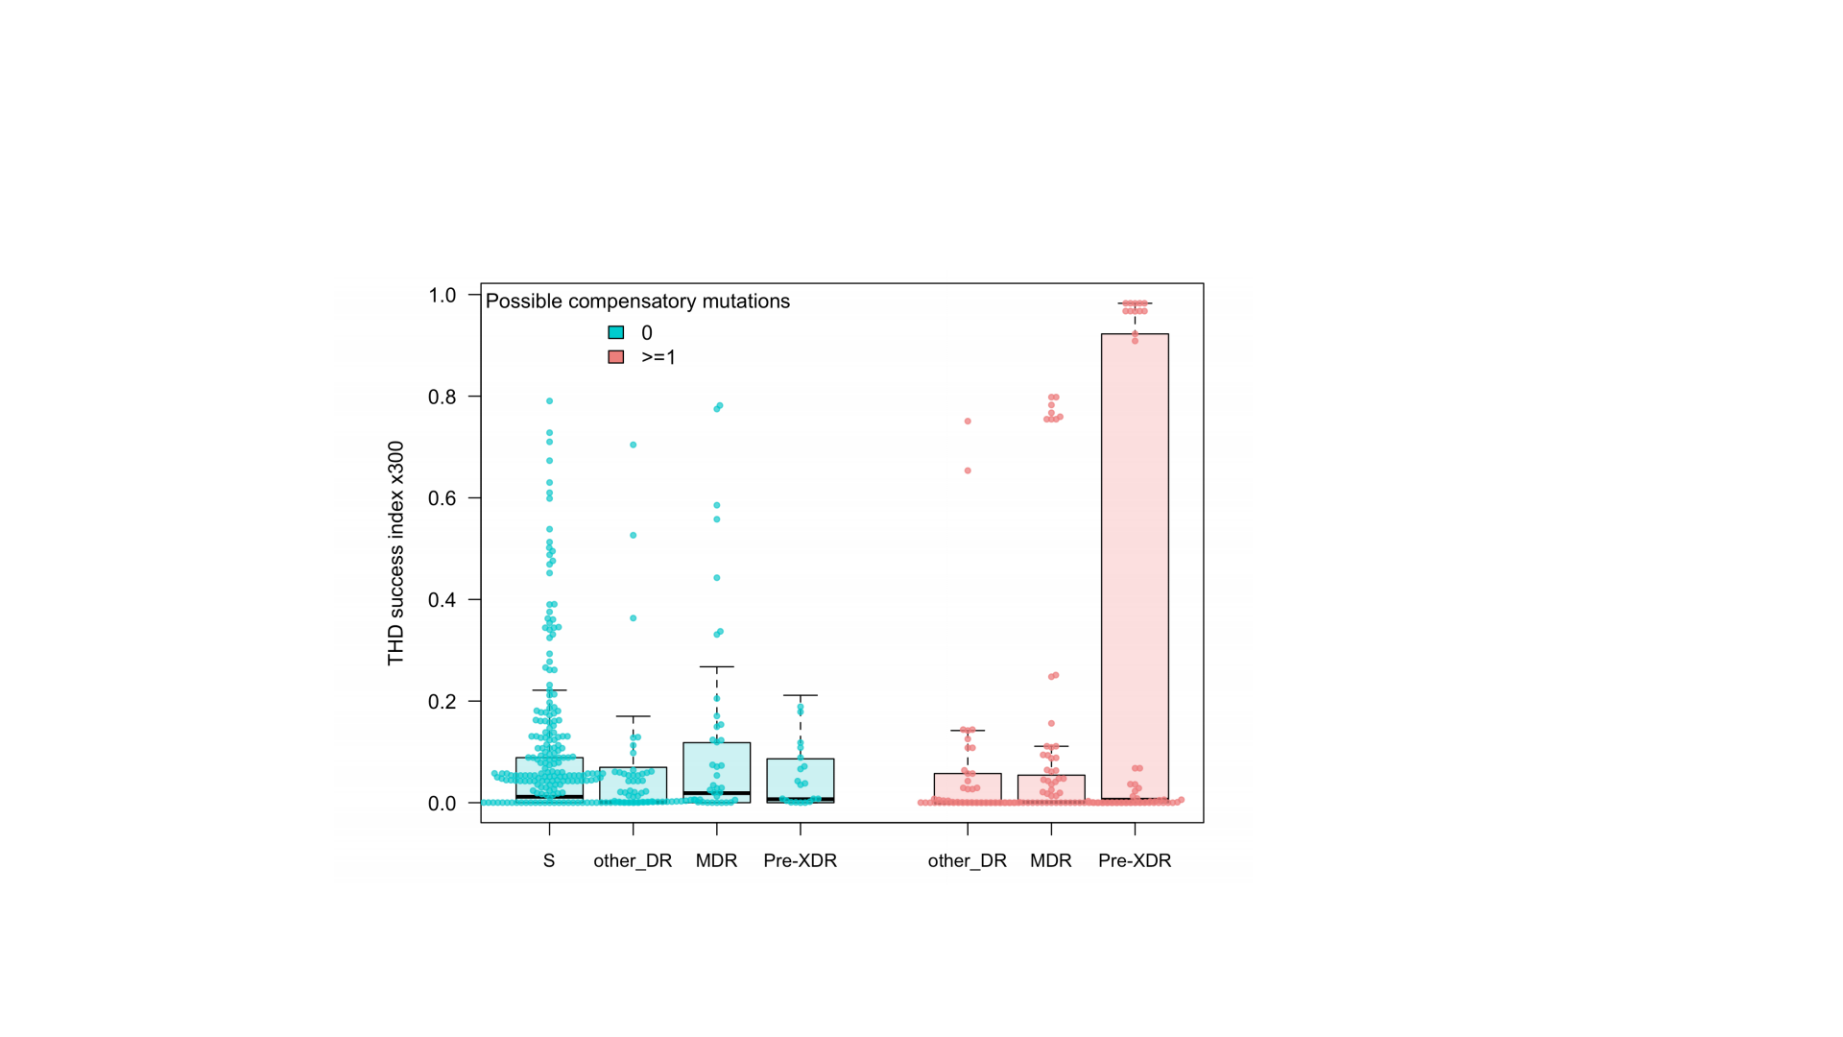


****Supplementary Fig. 6. THD analysis of L3.**** Colors indicate two groups: isolates without compensatory mutations and isolates carrying compensatory mutations. Within each group, isolates are further stratified by predicted resistance profile: drug-sensitive, other-DR (all resistance types excluding MDR, pre-XDR, and XDR), MDR, and pre-XDR.
